# Supplementary material
Source: PubMed Central journal article supplement (PMC5338673)
Supplement: supp_pp.16.01709_PP2016-01709R2_Supplemental_Material_data.pdf [file supp_pp.16.01709_PP2016-01709R2_Supplemental_Material_data.pdf]

1  
2 >NtExo70A1a  
3 ATGGGTATGCCAAGAAACACAGGTGGGGGAGGAATAGCAGTAGTGGGTATTGATATGTTA  
4 AGTGAAAGAGCAGCAAAGATGAGAGAAGCAGTACACAAGAGTCAGTCCATTACAGACAAC  
5 ATGGTTTCTATTTTGGGTTCTTTTGACCATCGTCTTTCTGCTCTTGAAACTGCTATGCGT  
6 CCAACCCAGATTAGGACTCATGCTATCCGGAAGGCTCATGTGAACATTGATAAGACTTTG  
7 AAGGCTGCGGATGTTATACTGTCCAATTTGATCTTTCTCGTCAGGCGGAGGCGAAAATA  
8 CTTAAAGGTCCACACGAGGACCTAGAAAGTTACCTTGAAGCAATTGAACAACCTGAGAAAC  
9 AACATTGCTTCTTCAACAACAACAAAAGCTTCAAGAGTAGTGATGGAGTGCTCAACAAC  
10 GCAAATAGCTTACTTGCTAAGGCTATTTCAAAGCTTGAAGAGGAGTTTAAGCAGCTGTTG  
11 TCTTCTTACAGCAAACCTGTTGAACCAGAACGTCTTTTTGAATGCCTTCAAATTCATG  
12 CGACCATCATCTGGATCACCAGGAGACTCTAACGGTAAGAACCATTTGTCAAGTAGTCAT  
13 GCTGAGCATAATAACGGAACAGATAATACCGTCTATACACCACCAACTCTTATCCCTCCA  
14 AGGATCCTGCCGCTACTGCATGATCTAGTCCAACAGATGGTTCAAGCTGGTCATCAACAA  
15 CAGCTGGTAAAAATATACAGGGATACCCGTTCTCCTGTTCTGGAAGAAAGTCTTCGCAAG  
16 TTGGGAGTGGAAAACTTAGCAAAGATGATGTCCAGAAGATGCAATGGGAAGTTCTGGAA  
17 TTTAAAATTGGGAACTGGATTCATTTTATGCGGATTGCTGTCAAATTGTTATTTGCTGCG  
18 GAGCGAAAAGTTTGTGATCAAATGTTTGAAGGATTTGAGCACCTCAAAGATCAATGTTTT  
19 GCTGAAGTTACTACTGGGAGTGTGCTGTGCTGCTTAGTTTTGGTGATGCAATTGCCAAA  
20 AGCAAAAGATCACCTGAGAAGTTGTTTGTGCTTCTAGATATGTATGAAATAATGCGGGAA  
21 CTTCAATCAGAGATTGAATCACTTTTTAGAGGTAAATCTTGCAACGAAATCAGGGAATCT  
22 GCCTTTGGTTTGTCAAAGCGACTTGCTCAGACAGCCCAAGAAACCTTTTCGTGATTTTGAA  
23 GAAGCTGTGAGAAAAGATGCAACCAAAACCGCCGTATCAGATGGAACCTGTCCATCCCTTG  
24 ACGAGCTATGTGATTAATTATGTGAAGTTCCTGTTTGACTATCAATCAACGTTGAAACAA  
25 TTGTTCCAAGAGTTTGAAAATGGAGATTCAAATCTCAACTAGCTTCCGTACAATGCGC  
26 ATAATGCAAGCTCTTCAAACCAATTTGGATGGGAAATCTAAGCAGTATAAGGATCCAGCT  
27 CTTACTAACTTGTTCTTATGAACAATATTTCACTACATGGTCAGATCTGTTTCGCAGGTCT  
28 GAAGCCAAGGATTTATTAGGTGATGATTGGGTTCAAAGACACCGGAGAGTTGTACAGCAA  
29 CATGCAAATCAGTACAAAAGAATTGCTTGGGCAAAGATTCTGCAATGCCTCTCGATTCAA  
30 GGGCTAACATCATCTGGGGCAGTAACTCTATGGGTGTAGACGGACAAAATAGCAGTGGA  
31 GTTTCAAGAGCGCTTGAAAAGAAAGTTGAAGACTTTCAATATTCAATTCGAGGAGCTT  
32 CATCAAAGACAAAGTCAATGGACAGTCCCAGACACCGAGTTACGAGAATCATTGAGGCTT  
33 GCAGTTGCTGAAGTCTTACTGCCTGCATACAGATCTTTCATCAAACGATTTGGGCCAATG  
34 GTTGAGAATGGTAAGAATCCCCAAAAGTATATCAGGTAACCGCTGAAGATCTTGAACGT  
35 ATGCTTGGTGAATTTTTTCGAGGGTAAGACGTTGAATGAGCCAAAACGATGA

36  
37  
38 >NtEXO70A1b  
39 ATGGGTATACCAAGAAACACTGGAGGAGGTGTAGATATGCTAAGTGAAAGAGCAAAAATG  
40 ATGAGAGATGCAGTGGAGAAGAGTCAGTCCATTACCGACAATGTGGTCAACATCTTGGGT  
41 TCCTTTGATCACCGTCTTTCTGCTCTTGACACTGCTATGCGTCCCCTCAGATAAGGACT

42 CATGCTATTAGGAAGGCTCATGGAAATATTGATAAGACTTTAAAGGCTGCTGAGGTTATA  
43 TTGTCCCAATTTGATATTTCTCGTCAGGCTGAAGTTAAAATACTTAAAGGGCCACATGAG  
44 GACCTAGAAAGTTATCTTCAAGCAATTGAACAGCTGAGAAAACAATATTCGCTTCTTCAGC  
45 AACACAAGAGCTTCAAGAGTAGTGATGGAGTGCTCAATCATGCTAATAGTTTGCTAGCC  
46 AAGGCTATCTCAAAGCTCGAAGAGGAGTTTAAAGCAGCTCTTGTTATCTTATAGTAAACCT  
47 GTTGAACCTGATCGGCTGTTTGAGTGTCTCCCAAATTCATGCGACCATCGTCTGGATCA  
48 CCTGGACACCAGGAGTCTAGTGGTAAGAACCGTCTGTCCAATAGCATTGCTGAGCAAAAT  
49 GGTGCAGAAAATGCTGTCTTACACCGCCAACCTTTATACCTCCAAGGATCCTGCCTTTA  
50 CTGCATGATTTAGCCCAACAGATGGTTCAAGCTGGTCACCAACAGCAATTTGTAAAATA  
51 TACAGGGATACACGTTCTCCTGTCTGGAAGAAAGTCTTCGCCTTTTGGGAGTGGAAAA  
52 CTTAGCAAAGATGATGTTCAGAAGATGCAATGGGAAGTTCTGGAAGCTAAAATTGGAAAT  
53 TGGATTCATTTTATGCGGATTGCTGTCAAATTGTTGTTTTCTGGGGAGCATAAAGTGTGT  
54 GATCAAATATTTGAGGGATTTGATTCACTCAAGGATCAATGTTTTGCTGAAGTTACTACC  
55 ACAAGTGTGCCATGCTGCTTAGTTTTGGTGATGCAATTGCAAAAAGCAAAAGATCACCT  
56 GAGAAGTTGTTTGTGCTTCTAGATATGTATGAAATAATGCGGGAACCTTCATTAGAGATT  
57 GAATCACTTTTCATAGGTAAAGCTTGCAATGAAATTAGGGAATCTGCCTTTGGTTTGACA  
58 AAGCGACTTGCCAGACAGCCCAGGAAACCTTTAGTGACTTTGAAGAAGCAGTTGAGAAG  
59 GATGCAACTAAAAGTCCGCTCTCAGATGGAAGTTCATCCCTTGACCAGCTATGTGATT  
60 AATTATGTGAAGTTCCTGTTTGACTATCAATCAACATTGAAGCAACTATTCCAAGAATTT  
61 GAAAATGGAGGAGATTCAAATTCACAGCTAGCTGCTGTTACTATGCGTATAATGCAGGCT  
62 CTTCAAACCAATTTAGACGGGAAATCTAAGCAGTATAAGGATCCTGCTCTGACTCACTTG  
63 TTCCTTATGAACAATATTCACTATATGGTCAGATCTGTGCGCAGGTCTGAAGCCAAAGAT  
64 TTATTAGGGGATGACTGGGTGCAAAGACACCGGAGAGTTGTACAACAACATGCAAATCAA  
65 TATAAAAGAATTGCTTGGGCAAAGATCCTTCAATGCCTATCAATTCAAGGGCTAACATCA  
66 TCTGGAGGCAGTAACTCTGGTAGTGTGATGGACAGAATAGTAGTGGAGTTTCAAGATCG  
67 ATTTGTGAAAGACAGGTTTAAAGACATTCAATGTGCAGTTCGAAGAGCTTCATCAAAGGCAA  
68 ACTCAATGGACTGTTCCAGATACTGAGTTGCGAGAGTCATTGAGGCTTGCGGTTGCTGAA  
69 GTTTTGCTGCCTGCATACAGATCTTTCATTAAACGCTTTGGGCCTTTGGTTGAGAGTGGT  
70 AAAAATCCCAAAGTACATCAGATATTAGCTGAAGATCTTGACCGCATGCTTGGTGAA  
71 TTCTTTGAGGGTAAGACGTTAAATGAGCCCAAACGGTGA

72

73

74 >NtEXO70A2

75 ATGGCGGCTTACACAGTGGTAATGGAAAACCTAAAAGAAAGAGCAGAATTCATGAAAGAATCAATGCACAAGAGCCA  
76 AACTATTACCGATAATATGATTTCCATTCTCGGCTCCTTTGATCACCGTCTCTCCGCCCTCGAAACCGCCATGCGTC  
77 CCACTCAGATAAGGACGCATTTCGATTTCGAAAGCACACGAGAACATTGACAAGACATTGAAGGTAGCTGAGTCCATA  
78 TTGGCTCAATTTGATCTTGCACGCCAGACGGAGGCTAAAATATTGAGAGGACCACATGAGGATTTGGAGAGTTATCT  
79 GGAAGCAGTTAATCAGCTAAGGAGTATTGTCAAGTTTTTTCAGCAGTACCAAAGGCCTTAAAAGTAGTATTGGCATGA  
80 TTAATCATGCTTCCAATTTACTGGCAAAGTCTGTTCTTAAGCTAGAAGAAGAGTTTCGTGAGCTTCTAACCTCATA  
81 AGTAAACCTGTGGAACCTGATCGCCTTTTCGATTGCCTTCCCAATCTCTGAGACCATCTACAGGATCACCTAGCAA  
82 AGGTGATGGTACTGGAATGAAAGAACATCAAAGAAGTTTAGAAACAGTTGTTTACCACCCTCCAGCGCTCATTCCCC

83 CTAGAATACTACCCCTTGCTACATGAGTTGGCTCAGCAAATGATTCAAGCCGGCCATCAACAGCAACTGTATACTATT  
84 TACAAGGAAATACGTTCTTCAGTCATGGAACAAAGTCTTAGAAAAGTGGTGTGGAAAGACTTGGTAAAGAGGATGT  
85 ACAGAAAATGCAGTGGGAAGTTTTAGAGGCCAAAAATAGGAAACTGGATTCACTTCATGCGGATATCCGTAAAACTTT  
86 TATTTGCTGCAGAGAAGAAAGTCTCTGATCAAATTTTTGAAGGTGAGGATAGTCTTAGAGATCAATGTTTCGCTGAG  
87 GTTACTGCAAATAGTGTAGCAGTGCTGCTTAGCTTTGGAGAAGCCATTGCCAAAAGCAAACGATCGCCTGAAAAGCT  
88 ATTTGTCCTTTTAGATATGTATGAGATAATGAGAGAACTTCAGTCAGAGATGGATATTGTTTTTGGAAAGCAAATATT  
89 GCAGTGAAATGCGAGAAGCTGCTAAAGTGTGACTGATCGTTTTGGCTGAGACAGCACAGGAGACCTTTGTAGATTTT  
90 GAAGAAGCAGTAGAGAAGGATGCCACCAAACCTTCTGTTCTTGATGGAACTGTCCATCCTTTAACTAGCTATGTGAT  
91 CAATTATGTTAAATTTTTATTTGACTATCAGTCAACTCTAAAGCAGCTTTTTGGAGACGCCGATGATGGTAATTCCA  
92 AGGACCAGTTGGGTGTTATAACCACACGGATATTGCAAGCTCTTCAGAGTAACCTGGACGGGAAATCTAAGCAATAC  
93 AAAGATCCTGCTTTGACTCAACTATTTTTGATGAATAATATTCACTATATTGTAAGATCTGTTTCGCAGGTGAGAAGC  
94 AAAGGATGTGCTAGGTGATGATTGGGTGCAAATACATAGAAGGGTAGTCCAGCAGCATGCAAATCAGTACAAGAGGA  
95 TATCTTGGTCTAAGATTCTGCAGACTCTCTCAGTCCAAGGAGTTCCACAGCTGGGAGTGGTTCATTTACCGGTGAA  
96 GTCACCAGTAGCAACAGCGGTGTCTCTAGGTCTACGGTGAAAGATAGGTTAAGACTTTCAACATGTTATTTGAGGA  
97 GATTCATCAGAGGCAATCTCAATGGACAGTTCCTGACAGTGAGTTGCGCGAGTCTTTAAGGCTGGCAGTCGCGGAAG  
98 TCCTATTGCCTGCTTACAGGTCTTTCATTAACGTTTTCGGGCCGATGATTGAGGGTGGCAAAAATCCCCAAAAGTAT  
99 ATCAGATACACACCAGAGGACCTTGAACGAATGTTGGCTGAGTTTTTTGAAGGAAAAACCTGGAAAGGACCTTAA

100

101

102 >NtEXO70B1

103 ATGGCTGAAAATGGCGAAGAAAACTCATAGCTGTTGCTCGTCATATTGCTAAAACCTTGGTCACTACTGATACTAT  
104 GACTGATGATATTCTTCAAATCTTCTCTAGTTTTGATAATCGGCTCCGTGAAAAGCTCACTGATGATCAGCCCCTA  
105 GCTGTGCTTCACTTGAACGAACCTTAAATCCCTTACCCTGTCAGATCTCTCGTTACGTCTCCACCGAACATCCCTTA  
106 TGGTCCGATTGAGTCTGATTCTTCTCTTTCTTGGATTCCCTTGACGAATTAATAGCCACAATTGCGGAGTGGAAACC  
107 TATGGCGAGTGACAAATCCGTTTTCTGCTTGTCTTGATAAAGCTGAGGATTTACTCCAACAAGCTATGTTCCGTTTTGG  
108 AGGATGAGTTCAAAACCTCATGCAACGCGCTGCTGAGTCTTGGATCTCACGCGCTACCAGAACGGCGAACCGGCA  
109 GCGAATCTGAACTACTCTCTGATTCCGAAGATGACAGTGACATTCTGTAGCACATCCGGTTACAGATTACGACAT  
110 CCTTATTGACGCTTTACCGGCGGAACCGTCAGCGATATTACGAGATCGCAACAAGGATGGTGGCCCGCGGATACG  
111 GGAAGGAGTGTTCGCACGCGTACAGCGCCTGCAGGAGAGAGTTTTCTGGAGGAGAGTCTGAGTAGACTGGGGTTGCAG  
112 AAGCTGAGTATTGATGAAGTGCAGAAAATGCAGTGGACTGAGCTGGAAGACGAGATTGAGAAAATGGGTCAAAGCGGT  
113 CAACGTTGCGCTCCGATTCTGTTCCCGAGTGAACGCCGTCTATGCGATCGCGTCTTTTTCGGATTCAACTCTGTTT  
114 CTGATCTGTCATTCATGGAAGTTTCTAGAGGTTCTACGATTACGCTTCTCAACTTTGCTGATGCTGTTGCCATCTCA  
115 AGTCGGGCACCGGAGAGACTTTTTCAAGGTGCTGGATGTTTATGAGGCGCTTAGGGATTTGATGCCTGAATTTGAATT  
116 GTTGTATTATGGATCAATATTGTGTGTTATTGAGGAATGAAGCTTTGACTATATGGAGAAGATTAGGTGAGGCTATTA  
117 GAGGGATTTTTATGGAGTTGGAGAATTTGATTGCGCCGCGATCCTGCCAAAACGCCTGTTCCAGGTGGTGGGCTCCAC  
118 CCGATTACTCGATACGTGATGAATTATCTCCGCGCAGCTTGTGATCCCGGATTTCTCTTGAACAGGTTTTTTGAGGA  
119 GTCTGCTAGTGTGTTGATTATAGAGGAGAAGTGGATCATAGAGCGCTTTCATCGTCGCCCTTGGCTGTTCAAATGG  
120 CGTGGACCATGGAGTTACTTGAGAGTAATCTGGAAGCAAATCCAAGATTTACAAAGACTCTGCTTTATTGGCTGTT  
121 TTTATGATGAATAATGAAAGATAACATTGTTTGAAGGTTAAAGATAGTGAGTTGGGATTACTTCTAGGTGATGATTG  
122 GATACGGAAGCACGCATCCAAAGTTAAGCAGTATCATGTCAATTATCAACGAAGTTCATGGAGTAAGGTTTTGGGAG  
123 CTCTGAAGATTGATAATAATGCTATGTGCGCTACTGGAGCATCAAGGTCTTTGAAAGAAAAGCTTAAAGTTATTCAAT

124 TCCTACTTTGAGGAGATATGTAAAACACAATCCAATTGGGTAATCTTTGATGAGCAACTGAAGGAGGATTTGAGGAA  
125 TTCCGTAGCTGGGATTTTGTCTCCAGCATACCGCAACTTTGTTGGAAGGTTGCAGAGTAGTCACGATGCTGGGAGGC  
126 ATGCGGAGAGGCATGTCAAGTTTAGTGTGGAGGATCTTGAAGCTCGAATTACTGAGTTGTTTTAGGGGAACAATGGA  
127 TCAGTTGGTGGCAGGAAGTGA

128

129

130

131 >NtExo70C1a ATGGTGAAGAATCACTTAGATAAAAAATGGCAGCTTTACAGGCAGCCAAAACACCTCGT

132 TCAGCCACGTCCACTGAGGCGTCACGCGCTGATCAACATTCCAGAAATAGCAGCCAGGAA

133 GAGTTAGATCATTCACTGAACACTCATATTGAAGACGCTAAGAAATTATCCGAAGATATT

134 GATCGATTTCGTGGAATCTCTTTCCATGTGCCACGATAAATCAAATCCCCCTGAAGTCCCT

135 GATTCGGTCGACACCTTTTCTAAAATCGTCGAGTCCAGGATAAAAAAGTATAACTCTTGC

136 GAAAATGCCACCAGATTTTGCAAGATGGCAGAGGAGGACACTTGTTTTATAGAAGCAGTG

137 ACAATGTTATCCAAATTGACAAATTCCTTGAGTGAATTTCCATCAGGTTCAATGACCACG

138 AGGTCGTTGAACCTAACGAGCATGGTCTTGCAACGTGCCATGACTTTTCATGGAAGAAGAA

139 TTGAGAAACTTATTAGAAGATTCTAGAGTGTCTTCCAATTCAGAATTCCTAAAAATTCT

140 TCATTCAATGCGACCAATCTATTAGATGGGGAGCAATGTGATTTGACACTTTTCGGAATCC

141 AGTGGAGAAGAGGAATATCCGTCGTATTCTCCAGATGTATTGACAAGAATGAATCGAATT

142 GCCTCAGCCATGATCTTGGCTGGCTATGAAACAGAATGCTGTCAAGTGTATTTCGATTTTCG

143 AGAAGAAATGCATTGAGTGAACAAATGAAAAAATCGAATTCGAGAGGATAAACATGGAG

144 GATGTTCAAAGAATGCCATGGGATTCTCTAGAAGGAGAGATTACGAGGTGGATCAGAGTT

145 GTCAAAAGTTGTTTCGACAACTCTATTCCCTGGCGAAAAGAGACTCGGAGACTCTGTTTTTC

146 TCCGATTCTCCTATGATTTCCCGAAGCTTATTTAGCAACCTGGCGCGGCCATTGTGATT

147 CAGCTTCTCGACTTTGCTGAGGCCGTCTCAATGACCAAACGCTCAGCCGAGAAGCTGTTC

148 AAATATCTAGACATGTATGAAGCTATACGTGATCTTATCCCAACGATCAATGAGTCGTGT

149 TCCAACGAATGTGAGAATGAATTGAAGTCCGAGATTTTCAGCTACTGGAGACAGAATAGGG

150 GAGTCAGCTGTGAGCATATTCTGTGATCTCGAAAATTCATTAATAAATGATGTGGCGAGG

151 ACACCAGTCCCGGTGGGGCAGTGCACCCGTTAACGCGTTACGTTATGAATTATCTAAAA

152 TATGCATGCGAGTACAAAGGCACCCTAGAGCATATTTTCCAGCAACATGTAAAATTGGAG

153 GAATCCAATTCCTGCAAATTTGAAACCAACATTGGAGGTAGAAAACAGAGAACGAAAGC

154 CCCCACGGTTCTGAAACAGTAGCCGGGACAACGCGTTCTCAATACAGTTAGTCACAATA

155 ATGGACCTTTTGGATACAAATCTTGAAGCTAAATCAAACCTGTACAGAGACCCTGCGTTG

156 CGCCACATTTTCTTAATGAACAATGGTAGGTATATCTTACAAAAAGTTAAAGTGTCCGCG

157 GAGATACACCAAGTGTGAGGCGACACGTGGTGTAGGAGAAGATCAACGATCGTGAGACAA

158 TACCACAAGAATTACCAAAGGGAAACATGGGGTAAGGTAATCCAAATCCTAAGCCATGAC

159 GGAATGCAAGTCCATGGGAAAGTAGTGAAGACAACAGTGAAAGAGAGGTTCAAGAATTTTC

160 AATACAATGTTTGTGAAATACACAGGAGTCAAAGCACTTGGGTTGTAAGTGACGAGCAG

161 CTTCAATCAGAGCTTCGTGTTTTCGATATCAGCTTTGGTAATTCAGCTTATAGGTCATTT

162 TTTGGGAGGTTTAGACAGTATTTGGACAATGGAAAGCAATCAGAGAAGTATGTAAAGTAC

163 CAGCCAGAGGATATTGAAACATTGATTGATGAACTATTTGATGGTAATTCTGCATCAATG

164 GCCAGGAGGAAGACATAG

165  
166  
167  
168  
169  
170  
171  
172  
173  
174  
175  
176  
177  
178  
179  
180  
181  
182  
183  
184  
185  
186  
187  
188  
189  
190  
191  
192  
193  
194  
195  
196  
197  
198  
199

>NtEXO70C1b

ATGGAGAAGAATAATGACAGTGGCTGTCCAACATCAGATATTGATCCATTCAAAAATAGT  
GTTTCCACATCTGATGAAAACCTCGGAAGCCCCTGAAAATATTGAAACGTTCTCCAAAATA  
ATAGAGTCCAGGATTGCAAAATATAATTCTTGTGAAATACCGACCAGATTTCGGTAAGATG  
ACAGAGGAAGAGTCATTTTTCTTGAAGCCGTGATGCATTTATCCAAATTGACAAATGTC  
ATCGCGAAATCATCTCCGTCAGGGTCAACGTTGTTGAATTGGACCAATTTGGTCTTGCAA  
CGAGCCATGACTTTTCATGGAAGAAGAATTCCGAACCTTATTAGAAGATTTTCGGAGGTTGT  
TCCAATTCAAAAGTGGATAAAAAATTTCGGATTATCCATCGTATCCGCCCGAGGTTCGTGACA  
AGAATGAATCGAATAGCCACTGCCATGATCTCAGCCGGTTTTGAAAACAGAATGTTGTCAA  
GTATATTCAATTTACGAAGAAACGCATTCTATGAGCAACTGAAAATGCTCGAATTCGAG  
AAGATAAACCGGAGATGATGTACAGAGAATGCCATGGGATTCTCTAGAAGGAGAAATCACC  
CAATGGATAAATGTTGCGAAGAGCTGCTCAAGCACTCTGTTCCCTGGCGAAAGGAGACTC  
GGGGAATCAGTTTTCTTCGATTCTCCAATGATCTCTCAAAGCCTATTTAGCAACCTGGCA  
CGTTCAATTGTAATTCAGATTCTTGACTTCGCTGAGGCGGTCTCCAGGACAAAACGCTCC  
GCCGAGAAACTTTTTCAAATTTCTAGACATATACGAAGCCATTCGCGATCTAGTTTCTGCC  
ATAAGTGAATCTTTCTCCAATGATGGTGAGCACGAACTGAAATCAGAGATCTTAGCCACG  
AGAGATAGGTTTCGGGGAGGCAGCCGTCAACGTATTCTGTGATCTCGAAAGTTCATCAAG  
AACGATGCAGCTAGAACACCGGTCCCTGGTGGTGCAGTGCACCCGCTCACACGTTATGTC  
ATGAACTATCTAAAATACGCCTGTGAATACAGAGACGCCCTTGAACATATTTTCCAAGAA  
CACGCAAAGTTGGAGGCATATTCCTCCGCCACGTACCCGTCCAAATGGAAATCATCACTG  
GATATTGATCACGTTGAGAGCGAAAGCCACTCGATGACGTAGCTGCCACGATGCCCTTT  
TCAACACAGCTCATGAAAATAATGGAAGTGGATTCAAATCTAGAAGCTAAGTCAAAC  
TTATATAGAGACCCTTCTTTGCGTGACATATTCTTAATGAACAACGGCAGATACATCTTA  
CAAAAAGCCAAAGGATCCACGGAGGTCCGCCAAGTGATGGGCGACACGTGGTGTGGAAGA  
AGATCAACGACCGTGAGGCAATACCACAAGAATTACCAAAGAGAAACATGGGGAAGAGTG  
TTACAAATACTAAGTCACGACGGGATGCAAATGAATGGGAAAGTGACAAAGCCAGTAGTG  
AAAGAGAGGTTCAAGAATTTTCAGCACAATGCTCGACGAAATCCATCGTACGCAGAGCACT  
TGGGTGGTGTGAGCGACGAGCAGCTTCGGTTCGGAGCTAAGAGTTTTCTATATCGGCGGTGTTG  
ATTCGGCGTACAGGTCTTTCTTTGGGAGATTTAGGCAGTATTTAGACAATACAAAGCAT  
GCAGAGAAGTATATAAAGTACCAGCCTGAAGACATTGAAACGTTAATTGAGGGCCTTTTTT  
GACGGCAATCCTACATCTATGGCACGGAGAAAGACGTAA

>NtEXO70C2

ATGGATGCAGAGAAAGTAACACAAACTTCTGAAACAAAATCCCATGACATTAATCCCAGT  
GACAAGCAACAAGAAAATCCTGACCCATTACCTCTGAAAGATGATACTGAAAATCCTTCG  
CCGCCTGACGAATCACAATCTGCAGAAGCAGAGATTGTTCAACAACTGCCAACAGATGAT  
GGTGTCAAGACAACAGATGATGGTCATGTCCAAGAAGATGATCCCAACAATGATGAGGTC  
AAGGTTGAAGATTCTTCTCCCTTGCTCCTGATCTCGGTAAGGTTTTCCGAAGAAATTGAT

206 CAGTTTATCTCTGATTTGTCAAACCTAAAAGGAGAAAATGAATCTAAGCCTCCCGATGTT  
 207 CCTGTCTTTGTGGAACAATTTGCTGTTCTTGTTGAGGCAAAGATTGAAGAATATGACGGT  
 208 GGTGATGCACCCATCAAATGGAGCCAGCTCTCTCAGGAAGACGCCATGTCTATTTTGGAA  
 209 TTTGTAGATCGAATCTCAAAGCTATTAATTTCTCTCTGTCAATTCTTTCCGGAGTACAAA  
 210 TATGCTTATTCAATCAGCCGCGTTGACGGTGTCTTTCAGCGCGCAATGTCTTATATAGAG  
 211 GAGGAATTCAAGTCGATCCTCTACGATTACAAGATTCTGATTGAGATTTCAATTCAGAC  
 212 ACTTCTGCCAAGCCTAATAAGGAACTAATTCATCCTCAGACACTAATCAAGATTGAGAA  
 213 CAAAGCTCTGTGCTGAATCCGCACCTTCTGAAGATAATAAATTTCCAGGCTACACTGAG  
 214 GAAATCGTGACAACAATGAATAAATTATCTAAAGCTCTGATTGCAGGAGGCTATGAAGTA  
 215 GAATGTTGTCAGGTCTATTTCTTAGCACGGAGGAAAGCTTTGGAGGAAAGTTTGCATAAG  
 216 CTTGGATTTGAAAAACACAGCATTGACGATGTGCAAAGATGCATTGGGATTGATTGGAG  
 217 AGAGAGATTACTGCTTGGATTATAGCATTCAAACATTGCACTAACGTGCTTCACTCCAGC  
 218 GAACGCAAGCTCGCCGATGCTGTATTTGCTGATCAACCATCAATTTCTGAGAAAATCTTC  
 219 AGCAATTTGTCTCGAGGTATGATGATCCAACCTCCTTAATTTTGTGTAAGCCGTTGCCATG  
 220 ACAAAGCGCGCTGCTGAAAAGCTCTTCAAGTTTCTTGACATATACGAGACTTTGCGCGAT  
 221 CTGCTTCCATTGGTGGACAAAATGTTTATTGTTTCTTACGCTGATGAACTCAAGGCTGAA  
 222 GCTACATTGACCCGGAGCCGCTTAGGAGAGTCCATGGTTTTCTATTTTTGCAGAGCTCGAA  
 223 AACTCAATCCAGGCCGATTCAAACAAGACTCCGGTTCAGGTGGTGGCGTTTCATCCATTA  
 224 ACTCGTTACATTATGAATTATCTGAAATATGTAGCCGAGTACAGAGACACCTTAGAACAG  
 225 GTCTTCAGAGAACATCAAATGATAGAAAGAGCTGATTCAACCACCGGATCAGATTTTCGAC  
 226 TGCCAAAATCCACAAGCTCAAAGCGAGACATTGAATAAGCTATCGCCTTTTGAAGCGCAC  
 227 ATGATGAAAGTCATGGATCTATTGGATGCAAACCTGGAGGCAAATCAAGGCTGTACAAA  
 228 GACTTCACTCAGCTCAATATTTATGATGAACAACGGACGATACATTTTGCAGAAAATA  
 229 AAGGGATCACCAGAGATCAATGGTTTAAATGGGGGATCAATGGTACAGAAAGCGATCTTCG  
 230 GACCTTAGACAATACCACAAGACTTACCAAAGAGAACTTGGAGTAAACTGTTGCAATGT  
 231 TTAAACCATGAGGGATTGAATGTGAATGGAAAAGTGAATAAACCAATTTTGAAGAGAGA  
 232 TTCAAGAGTTTCAATGCATTATTTGACGAGATACATAAAAACAAAGCAGTTGGGTGATT  
 233 AGCGACGAGCAACTGCAATCGGAGCTGAGAGTTTCAATATCGAACATGGTTATACCGGCG  
 234 TACAGATCATTCTTGGGAAGGTTTAGTCAAACCTTTACTCCAGGAAGGCAGACGGAGAAG  
 235 TATGTAAAGTATCAAGCTGAAGAAATTGAAACACATATTGATGAGTTATTCGATGGAAAT  
 236 GCTACGCCATGGGGGAGGAAGAAATTGTAA  
 237  
 238  
 239 >NtEX070D1a  
 240 ATGGAACCACCGGAGAACGACGTCGTAGCATTGAGTCAGCTGAGAAGATAATCCTCCGG  
 241 TGGGATTCCACGGCGTCGGAAGACGCTCGAGAGAAAATGATCTTCCGCCGGCGATCGCCAC  
 242 GAGATCGATCGGTACCTGCAAGCCGTCGATGAAATCCAACGATCAATGGAGTTGCTACA  
 243 CTTTCCGACGACCAGAACAAAGCCAATAGTGCGATCCAGATCGCCATGGCTCGGCTTGAA  
 244 GATGAGCTTTCGAACATACTCATTGCTCACACAACCTCCGATGGAAGCTGAATCTTACT  
 245 GACACCAGTAACGAAGATTACCACGACAACAACAGTGAGGTTGACTCGCCGTTGACCAAG  
 246 GAGTTGGAGCATCAAGAGAGTAACAGCAGCGGCAGCTATCGATCTACAAATAGCATCCGT

247 GAAATCGATCTCATGCCGTCCGATGCAATTTACGATCTTCGATGCATCGCCGAGCGAATG  
248 ATTTCCGCCGGGTACCTCCGGGAGTGTATTAGGTGTATGGCAGTGTACGCAAGTCTGCA  
249 GTGGACTCAAGTTTTCCGGAACTCGGAATAGAGAAGCTGAGCATCGGAGATATCCAGAGA  
250 TTAGAATGGGAACTCTAGAACTAAGATCCGACGGTGGATACGAGCTGCAAAAGTATGC  
251 GTTCCGATACTTTTTGCTAGCGAAAAAAGCTCTGTGAGCAAATCTTCGAAGGTTTAGGC  
252 ACTGCAACGGACGATGCTTGTTCACAGAGACAATCAAAGGTCCAGCTATTAGCTCTTC  
253 AATTTTGCGAAGCCATTAGTATTAGTCCGGCGATCACCGGAGAAATTGTTTAAGATATTG  
254 GATCTTCATGATGCTTTATCGGATTTACTGCTGGATATTGAGATTGTTTTCGATTCAAAA  
255 TCTTCGGAGTCAATTAGGGTTCAGGCTGTAGAGATATTATCTAGGTTAGCGGAAGCCGCG  
256 AGAGGGATATTATCGGAATTTGAAAATGCAGTGCTTCGAGAACCTTCTAAGGTTCTGTGTC  
257 CCTGGAGGGACAATTCATCCCTTGACTAGGTATGTATGAATTACATAAGTTTAATCTCG  
258 GACTACAAACAGACTATGCTTGAATTGATTGTCTCTAAGCCGTCAACAGGTTCAAGGTAT  
259 TCTAGTGATCCTAACACCCCTGATATGGATTTTGGTGAGCTAGAATCACAGACCCCTTTG  
260 GCGCTTCATTTGATCTGGATTACTGTGATTTTGAATTCATCTTGAAGGTAAGTCTAAG  
261 TTCTATAAAGATACTTCTTTGGCACATTTATTTGTGATGAACAATGTACATTATATTGTT  
262 GAGAAGATTAAGGCTCACCTGAGTTAAGGGAGATGATAGGGGATGATTATTTAAAGAAA  
263 TTAACAGGGAAATTCAGGCAAGCAGCTATTAACCTACCAGAGATCAACCTGGGTGAGGGTT  
264 TTGTATTGTTTGCAGAGATGAGGGTTTACATGTTAAAGGCAGTTTTTTCATCTGGGGTGTCT  
265 AAGAGTGCATTGAGAGAGCGGTTTAAAGACATTCATGCTATGTTTGAAGAGGTTCATAGG  
266 ACTCAGTCCACATGGTTGATCCAGATACTCAGCTCCGGGAGGAGCTGCGTATTTCTATA  
267 TCCGAGAAATTGATCCAGCTTATAGATCATTTCTCGGAAGGTTCAGGACTCATATTGAG  
268 AGCGGAAGGCATCCGGAATACTACATCAAGTATTCTGGTGAAGACATTGAGACTGCTGTC  
269 TTGGATTTCTTTGAGGGGTATCAAGTTTCAACAACATAAGAAGAAGATCTCAGTGA

270

271

272 >NtExo70D1b

273 ATGGAATCACCAGAAAAAACGACGCCGTTGCATTTGAGTCAGCTGAGAAGATAATTCTC  
274 CGGTGGGATTCAACGGTATCTGAAGAAGCTAGAGAGAAGATGATATTCAACGGCGATCGT  
275 CACGAGATCGATCGCTATTTAGAAGCCGTTGATGAAATCCAACGGTCAATGGAGTCCACC  
276 ACGCTCTCCGTCTCCGACGACCAGATAAAGCCAACACTGCGATCCAGATCGCCATGGCC  
277 CGTCTCGAGGACGAGTTCCGCAACATACTCATTGCTCACACGAACGCAATCGAAGCCGAA  
278 TCATTAAGTATCCAAAGTCTTTGAGAAGAAGACTGCCGCGATACTCCACGCGCCGGCGAC  
279 GATGATTGTTTCCAGCAAAGAGCTGGAAAAACAAGAGAGTAGCACCAGCAGCAGTTATCGA  
280 TCTACTAACAGTATCCGCGAAGTGCATCTCATGCCGTCAGAAGCAATATACGATCTCCGG  
281 TGTATCGCGGAGCGTATGATTTTCCAGCTGGATATCTCCGGGAGTGTATTAGGTGTATGGC  
282 AGTGTACGCAAGTCTGCTGTGGACTCGAGCTTCCGGAAGCTTGAATAGAGAAGCTGAGC  
283 ATAGGAGATATACAGAGACTTGATTGGGAGACCCTTGAAGCTAAGATTCGTAGATGGATA  
284 CGAGCAGCAAAAGTATGCGTTTCGCACACTTTTCGCCAGCGAGAAGAAGCTCTGCGAGCAA  
285 ATCTTTGAAGGTTTGGGGACGGCAACGGATGATGCTTGTCTTTATGGAGACTATTAAGGT  
286 CCAGCTATTAGCTGTTCAATTTTGCAGAAGCCATTAGCATTAGCAGGCGATCGCCTGAA  
287 AAGTTGTTTAAGATATTAGATCTTCATGATGCTTTATCGGATTTATTAAGTATATTGAA

288 ATTGTTTTTCGAGTCAAAATCTTCGGAGTCAATTAGAGTTCAGGCAGTAGAGATATTGTCT  
289 AGGTTAGGGGAGGCTGCTAGAGGGATATTATCGGAATTTGAGAATGCAGTGCTTCGTGAA  
290 CCTTCTAGGGTTCCTGTCCCCGGAGGGACAATTCATCCCTTAACTAGGTATGTCATGAAC  
291 TATATAAGTTTAATCTCGGATTATAAGCAGACGATGGTTGAGTTGATTGTTTTCAAAGCCT  
292 TCAACGGGATCAAGGTATTTCGAGTGATCCTAATACACCTGATATGGATTTTAGTGAGCTA  
293 GAAGGGCAAACCCCGTTGGCGCTTCATTTGATTTGGATTATCGTCATTTTGCAGTTC AAT  
294 TTGGATGGTAAGTCTAAGCACTATAAGGATACCTCTTTGGCTCATTTGTTTATGATGAAT  
295 AATGTCCATTATATTGTTGAGAAGATTAAGGATCACCTGAGTTAAGAGAGATGATTGGG  
296 GATGATTACTTGAGAAAGTTAACTGGGAAATTCCGGCAAGCTGCTGTCAATTACCAGAGA  
297 GCAACATGGGTGAGGGTTTTGCATTGTTTGGAGAGATGAGGGATTACACGTGAGTGGGAGT  
298 TTTTCATCCGGGGTGTCCAAGAGTGCATTGAGAGAGAGGTTTAAGGCATTCAACGCCTTG  
299 TTTGAAGAGGTTACAGGACTCAGTCCGTGTGGTTGATACCAGATACGCAGCTCAAGGAG  
300 GAGCTGCAAATTTCCATATCCGAAAAGTTAATCCCAGCATATAGATCATTTCTTGGACGG  
301 TTCAGGAGCCATATAGAAAGTGGGAGGCATCCGAAAATTATATAAAGTATTCTGTGGAG  
302 GATTTAGAGAATGCTGTCTTGGATTTCTTTGAGGGGTACGCTGTATCACAGCACTTGGCG  
303 AGAAGATCTCAGTGA

304

305

306

307

308

309 >NtEXO70E1a

310 ATGGGAGACTGTGAAACTCTAGTCCCCTTAATGGAAGAGGAAGAAAACCTAATAGCTGCTGCTCAGAACATTGTAAA  
311 AGCGTTAGGGTCAAATCGGACTTTAACCGATGATGCTAGAAAAATTCTGGCTGATTTAGGCACCCAATTGTCTTCCA  
312 TAACTAGAGTGAGTGAAACCCAAGATGAGGATTCTGGTGATCAAAC TGAGGAGCAGTTTATTGAGTTGGAGGAGCAG  
313 CTTAACTTAGTTT CAGACTAAGGT CATGAATTGGGAGGTGGGT CAGTCAATGATTTGGGATTGTGGCCAAGAAGAAGC  
314 ATATGAGTATTTGAGGTATGTAGATCAAGCTCGAAAATTGATCGAGAGATTGGAGGGTTTGAATGTGGATAAAGGTA  
315 GTAGAGAAGACGAGCTTTTGC GCAAGGCTCATGATCTTCTTCAAACAGCAATGAATCGGCTTGAGGAGGAGTTTACT  
316 CATTTGCTTGTT CAGAACAGGCAGCCTTTT GAGCCTGAGCATATGTCTTTTCGTTCAAGCGAGGATGATACATTAGA  
317 TGATGGCTCTATTGTGTCTTTTGGGGATGACTCGGTTGAGGATGTGGTTCAAAGAGATAGCATGAGTAGGAGCTTTG  
318 AGGAGTACATCATCGAACTCGTGCATCCGGATGTTATTCTGACTTAAGATGCATCGCCAATTTGATGTTTCGATTCA  
319 AATTATGGCCGGGAGTGTTCTCAGGCATTTATCAATGTCCGAAAAGATGCCTTGACGATTGCCTCTTCATCCTTGA  
320 AGTTGAGAAGTTGAGCATCGAGGATGTATTGAAGATGGAATGGAAC TCGTTGAACTCCAAAATCAGGAGGTGGATAC  
321 GGGCTATGAAGATATTCGTGCGCATTTATCTTGCCAGTGAAAAGTGGATAAGTGATCAGATTTTTAGCGAGCTGGAA  
322 GGAGTTAGTT CAGTTTGCTTTGCTGAGGCCTCGAAAGCTTCAATCGTACAGCTTCTGAACTTTGGTGAAGCCATAGC  
323 TATTGGCCCTCATCAACCGGAGAAGTTGATT CG  
324 GATTCTTGACATGTATGAGCTGCTCGCAGATCTTATCCCAGATATTGACGCTATGTACTC  
325 TGATGAGGCGGGTTATGTGTTAGAACAGAATGCCAGGACATCCTTAGAAGTTTGGGCGA  
326 TTGCGCAAAGGCAACCTTTCTGGAATTTGAAAATGCTGTTGCTTCCAGCATATCGGCCAA  
327 CCCTTTCCCGGGTGGTGAATAACCATCTAACGAGGTACGTTATGAACTACATGAAAAC  
328 TCTTATCGATTATAGCAAAACGCTTGATGAGCTTCTGAAGGGATACGAGAAGGAAGATT C



329 AGCGGCCATTTTACCACACATGACACCCGATAGAGAAGAAGATAACACGGACAGACGCTG  
330 TAATATATCTCCACTGGCTCAACATTTTCGATCCTTCACTTCAATTTTGAATGCAACCT  
331 TGAGGATAAGTCCAAGTTATAACAAGGATGACTCACTAGGTCACCTTTTCTTAATGAACAA  
332 TATTCATTACATGGCTGAAAAGGTGAAGAATTCTAATCTAAGAACAATACTTGGCGATGA  
333 TTGGATTGCGAAACATAATTGGAAATTC AACACCCATGCAATGAGCTACGAGAGAGCTAC  
334 ATGGAGCTCTATACTCTCTTTACTCAGAGATGAAGGGCTACAGAATCCAGGCTCAAATTC  
335 TATCTCGAGAACTCTTCTCAAGGAGAGACTACTCAGCTTTTATCTCGCATTTGAGGATGT  
336 TTACAAGAGCCAGACAGGATGGTTCGATCCCAGATAGTCAACTTCGTGAAGATCTTCGAAT  
337 ATCAACATCACTCAAGGTTATTTCAGGCATACAGGACATTTGTTGGAAGACACACAAACCA  
338 TATAAGTGATAAACACATAAAGTATACTGCGGACGATTTGGAGA ACTTCCTTTTGGATCT  
339 TTTTGAGGGATCTCCAAGATCATTGCATGGTTCCACAGGAAGTGA  
340  
341  
342 >NtEX070E1b  
343 ATGTTGTGTGGGTTTAACTATATGGGAGACTGTGAAGCTACTCTTCCTGTAATGGAGGAT  
344 GAGGAAAAGCTGATTGCAGCTGCACAGCAGATTGTGAAAGCATTGGAAAAGAAAACAGAAT  
345 TTAACACATGATGCAAGAAAAATTCTGGCTGATTTAGGCTCTCAGTTGTCTTCCATAACC  
346 AAATTGAGTGAAAACAAACATGAAAAATTATTTGGTGAACTGAAGACACTGTAGAGAAG  
347 TTCAGTGA ACTTGAGGAGCAGCTTAACATTGTGCAGAATAAGGTGATGAGCTGGGAAGTG  
348 GATCAATCTGTTATATGGGATTGTGGTCTGAATATGCAGATGATTATTTGAGGTCTGTG  
349 GATGAAGCTCGAAA ACTGATTGAACGGTTAGAGAGTTTGAATGTGGATAAAGATAGTAAA  
350 GAGGATGAGCTTTTGTGCAGGGCTCATGAGGTTATGCAAATAGCGATGAATCGGCTTGAG  
351 GAGGAGTTTAGGCATTTGCTTGTTCATAACAAGCAGCCTTTTGGCCTGAGCACTTGTCT  
352 TTTCTGTTCAAGCGAAGATGATGAGGGTTCTATTGTTTCATTTGGAGATGACTCAGTAGAG  
353 GATGTGGTTCAAAGAGATAGCATGAGTAGGCGCTCAGAGGAATACGTAGTTGAACTTGTG  
354 CATCCGGATGTGATTCTGACCTAAGGTGCATTGCCAATTTGATGTTCAATTCAAATTAT  
355 GGTAGAGAATGTTCTCAAACATTTATCAGTGTTAGAAAAGATGCATTGGATGATTTTTTTA  
356 TTCATTCTTGAAGTTAAGAAGTTGAGTATTGAGAATGTGATGAAGATGGAATGGA ACTCA  
357 TTGAACTCCAAAATCAGGAGGTGGATACGGTGTATGAAGATCTTTGTTTGC GTTTATCTA  
358 GCGAGTGAAAAATGGTTAAGTGATCAGATTTTTTGGTGATCTTGATT CAGTTAGTTCCGTT  
359 TGCTTTGCTGAATCTTCAAAGCTTCAACTGCATCTACTGAAATTTGCTGAAGCAGTG  
360 GCTATTGGATCTCATCAACCGGAGAAGTTGATTCCGATTCTTGACATGTATGAGGTGCTT  
361 TCAGATCTTATCCCAGATATTGATGCTATGTACTCTGATGATGCTGGATTATGTGTTAGA  
362 ACCAAGTGCCAAGACATCCTCGAAAGCTTGGCCGATTGTGCAAGAACAACATTTCTTGAA  
363 TTTGAGAATGCTGTTGCATCCAGCATATCGACGAATCCTTTTCTGGTGGTGAATACAT  
364 CCTCTACAAGATACGTTATGAACTACATGAAA ACTCTTACAGATTATAGCAAGATCCTT  
365 AACGAGCTTCTGAAGGACAACGAGCAAGAAGATTTGGTGGCGATTTACCAGAAATGACA  
366 CCGGATAGGGAAGAGGACAACAGTAACACAAGTTGCTACATTTCTCCACTGGCTCAACAT  
367 TTTCGAACCTTCACTTCAATGTTGGAATGCAACCTAGACGATAAGTCCAAGTTGTACAAG  
368 GATGAATCATTAGGCCACCTTTTCTTGATGAATAATATT CATTACATGGCTGAAAAGGTG  
369 AAGAATTCTCATGATCTAAGAACAATACTAGGCGATGATTGGATTGCGAAACACAATTGG

370 AGATTCCAACAACATGCAATGAACTACGAGAGGGCTACTTGGAGCTCCATCCTTTTCGTTA  
371 CTTAGGGACGAGGGGCTTCAGAATCCAGGCTCAAATTCTATCTCTAAAACCTCTACTCAA  
372 GAGAGACTGCACAGCTTTTATCTTGCATTTGATGAAGCTTACAAGAGCCAAACAGGTTGG  
373 TCAATACCTGATTGCCAACTTCGTGAAGATCTTCGAATCTCAATATCTCTCAAAGTTATT  
374 CAAGCATA CAGAACATTTATCGGAAGGCACACTAACCATATTAGTGACAAATACATTAAG  
375 TACAGTGCCGATGACTTGGAGAATTTCTTGTTGGATCTCTTTGAGGGATCTCCAAGATCA  
376 TTACATGGTTCTCACAGGAAGTGA  
377  
378  
379 >NtEXO70E2  
380 ATGGGTGATGATAAATCAGTGGT CACAGTTCCTGATGGGGAACAACACATAATTGCTGCA  
381 GCTCATCACCTTGTGAAGGCGTTACGAGCCAGCACGAGCTTGAGCATTGAAGTTAGAAGA  
382 AGTCTAGCCGATCTTGACATTCACCTGGCTGCAATGACTGAAGCAAAGAGGATGAGACC  
383 TCAAGTCTCAGAGAGATTGAAGGTAGGTTCAAGT CAGCTCAGGTAAAGATCTTGACTTTG  
384 CAGTCGAATTTCTTGAAGATATGGGATGCTGGTCCTTCACAACTTCTTGAGTACCTGCAC  
385 GCTGTAGAAGAAGTT CGAACTATAACGGTGACCTTGCAAAGCGTGGCTCCAAACCATAAT  
386 GGGAAACAAAACAGACTAGCTAATCAAGCTCACAGTGTGTTGCAAATGGCAATGGCAAAA  
387 CTGCAGGAAGAAGTTATCAACATTCTTGACAGAATAAGCTGTGTTTTGGGCATGATTAT  
388 GTGTCATTCCACTCGTGTGAAGAGTTCGTTGTGGATGAGGAGTCGATGGTTTTCAACTGAA  
389 AATGATT CAGTTGTGGAACTTCTTG CAGGGAGAGTAGTGGAGCTGAATCAGAAGAATGT  
390 ATAATGGATTTGGTTCATCCATATATTGTTCTCATGTCAAGTCTATTGCAGATGTAATG  
391 TTCGCTT CACATTACGATCAGGAATTTTGCCAGGTCTTTATCAGATTCTGGAAAGATGCA  
392 TTAAATGACTACTTAAGGCTTTTTCTGTATGCAACAAACCAGCATTGAAGATGTGCTGAGA  
393 ATGGATTGGACTTGTGTTGAGTTGCAGAATAAAGAAGTGGCGCCAGGCAACGAAGAACGTT  
394 ATTGCATTCTATCTCCCTAGTGAGAAAAACCTCTTTGATCAACTTCTAGGTGAGTTTGGA  
395 TCTGTTAGCTCAAAC TGTTCATTGAAGCTTCAAAGGATGCAATGTTGTGTCTTTTAAAT  
396 TTTGGCCAAGCTGTAGCTATTGGCCCCCTTCGGCCAGAACGCCTTTTTTTGTTTACTTGAT  
397 ATGTTTGAGCTTCTAAGAGATCTTTGTCTAGACGTGGATGCTTTGTTTTGTGAAAATCAG  
398 GGTAGTTTT CATTAAAATGGAGTACCATGAACTCCTGAAAAATCTTGGAGATTCTGCAAAA  
399 GCAATCTTTCTGGAGTTAGGGAATCACATTGCTTCAAACACTTCAACAACCTCCCTTCTAC  
400 GGAGGAGGTGTT CATCCTCTTACCAAGTACGTTATCAATTATTT CATGCTTCTTT CAGAA  
401 TATTGTGATACCTTGAAGTTCCTTCTTGAGGACAGAGAGGTACAGAATTTGGAAGGCGTT  
402 GTTGATGCTATGGCCAGGCTCGACGTTTCTTCTGAATTCTCATGTCCATTGGCTCTTCAC  
403 TTGCAGTCAGTAGCATCCATGCTTGAATCCAACCTTGACAAAAGGTCCAATTTATATAAA  
404 GATGGTTCCTTAAAGCACATCTTTCTGATGAACAACATCCATTACATGGTT CAGAAAATC  
405 AAGAACTCCAAAATTAGA ACTTGTGTTTGGTGTAGTGGATAAAAAACCGTATTGTAAGA  
406 TACGTGCAGCACGAAAAAAGGTACGAGAGAATAACATGGAGTCCTATCTTGTCTTTGATT  
407 ACCGTTATGAGAAATCAGGAAAGACAGTTC TCAAGGAGAGGTGCAGAAATTT CAGTATT  
408 GCTTTTGAGGATGTGTACAAGAACCAGACAGGATGGACTATCCAGATATTGAGCTTAGA  
409 GAAGAATTGAGAATTTCAACAGCGTTAAAGGTTGTT CATGCCTACAGGCCATTTATTGGA  
410 CATGTGAAGAAATCTATTAGTGACAAGCACATAAAGTATACTGAAGATGAGTTGGAGAAG

411 TATCTCCTGGATTTTTTTTCAAGGTTCAACAAAGTCACTGAATCATCATCAATGGAGGAGG  
412 TGA  
413  
414  
415 >NtEXO70F  
416 ATGGCGGCGACTATAGAAGGACAAGATAGGGTTCTTGCTGCAGCTCAACAGATCGTCAAG  
417 AGTCTCAACACTTCCACAAATGTTGACACTGATGATATGCTTATGATCTTATCTACCTTC  
418 GATAATCGCCTCTCTAAGCTCTCCAATTTTATGACTTCTTCATCTTCTCCACTCCTAAC  
419 TCCGCCAAAGCTGCCGCTGCCGCTGCCGGAGGCGATGATTCCTTTGTGGATCCTCGATTC  
420 GAAGCTGCCGAGCAACTTATCCTTCATTGGAACCTCCCCTCCCAACGCCGATCCTGATTCT  
421 ACCTTGATTACCTCGCCCGCTTGACGAGATTATTAGATGACCGACGATCTGAATCTT  
422 CAGCCGGAAAATGATCTCGTCATGGACCGAGCTGAGGCTGCTCTTCAACATGCCATGGCT  
423 CATTTAGAAGATGAGTTTTCGCCATATTCTCATTGGCAATACGGTTCCCTTCGATGCTGGC  
424 CGCCTCCACGAGTCTCCTTCATTGCGCCGTTGTTCCATTTCTTCATCTGCTGTGAAATC  
425 CCTGATTTTAAAACCGGCACTTCTCCGAGGATCAGGAGGATGTTAGCAGTGGAAGGTAC  
426 AATCATGTCAAAGGGAAGAGCCTTGAGGAGATGAATTCTCCCTTGATTTGGTATATCCG  
427 GATGCTATTATTGATCTGAGAGAGATTGCTAACCGTATGATTCGATCCGGATATGAAAAG  
428 GAATGTTGTCAAGTATACTCTAGTGTTCTGATAGAGAGGTGCTTGATGAGTGTCTAGCAATT  
429 CTTGGCATTGAGAACTGAGCATTGAGGAGGTCCATAGGATTGAATGGCAGTCGCTGGAC  
430 GAGAAAATGAAGAAATGGATTTATGCTGTAAAAGTTCTGGTGAGAATCCTTTTATCTGCT  
431 GAAAAGAGCTTGTGTGAACAGATTTTTTGTAGGCTCAGAGTTGATTAAAGAAGTGTGCTTT  
432 ATGGAACTGCAAAGGGCTGTGTGATGCAGCTCTTGAATTTTGGTGAAGCTGTGGCGATA  
433 GGGCGAAGGTCTGCTGAGAAGTTGTTTAGGATTCTGGATATGTATGATGCCCTCGCAGAT  
434 GTTTTGTCTGACATAGACTTGCTTTTTAACGATGAATCTGGTGAATGGTGTGTAGTGAG  
435 GCAAAAGGGGTGTTAGATGGCCTAGGAGAAGCAGCTATTGGGACGTTTGTGGAGTTTGAG  
436 AATGCAGTTCAGCGGGAGGCTTCAAAGAAACCAACACAAGGAGGTGAAATCCACCCATTG  
437 ACTCGTTATGTTATGAATTATGTGAAATTGTTGGTTGATTATAGTGATACATTGAATGGA  
438 CTTTTAGAGAAGGTAGAGAGTGAATGTGAACCTGACAGTTCGCGGATTGATAATGGTGAT  
439 AATTTGGAGTTTGAGAATGTCCCACTTGGGAGGCGGTTGATGTTACTGATCAAGTCT  
440 TTGGAAGCTAATCTTGAAGGGAAGTCGAGAATGTATGAAGATAGTGGAATGCAATATATA  
441 TTTTTGATGAATAATGTACATTACATAGTTTCAAGAAAGTGAAGATTTCGAGCTTCAAAAA  
442 CTTTTAGGTGATCAGTGGGTGAGAAAGCGAAGGGGTCAAATTCGACAACATGCTACAGGT  
443 TATCTTAGAGCTTCGTGGAGCAAGTTCTATCTTGTGTTGAAGGATGAAGGGCTTGGTGGG  
444 AGCTCAAGCAATGCCTCAAAGACAGTCTCAAGGAGAGGTTTAAAGAACTTCAACGTATGT  
445 TTTGAAGAAATTTATAGAATCCAAACGGGTTGGAAGGTCCCAGATGCTCAACTGCGCGAA  
446 GAACTGAGAATATCTATTTCTGAAAAAGTGCTACCTGCATATCGGTCTTTTTTGGGGAGG  
447 TTTGGGGGTCATTTAGAGAGTGGAAGAAATGCGGGGAAGTACATAAAGTATACTTTAGAG  
448 GACTTAGAGGGTTACTTGTGGATCTATTTGAAGGAACACCTCTTGTGTTTGCACCATATG  
449 AAAAGAAAAGGCACGTAG  
450  
451

452 >NtEXO70G1a  
453 ATGACGCAGATGGAGAAAGGCATTGAACATTTGATCTCTGCAAGAAAATCTTTGAGAGTAAATTTTGGAGAAGTCAAA  
454 AGCCTTAGGTTTATCTATTGAAAAAGCTGGGCCTAGATTTGATGAGATTATGCAGAGATTGCCATCCTTGGAGGCTG  
455 CAATTAGGCCAATTAGGGCTCAGAAAGATGCCCTTGGTGCCGTGGGTGGCCATATTAACCGTGCCGTGGTTCCCTGCC  
456 ACCGCAGTTCTCAAAGTGTGGATGCCATTCATGGACTCGAGAAGTCCTTGTCCGATCCTCAATCGGACCTCCCTGG  
457 TTACCTTGGCGTGCTCAAGAGACTTGAAGAAGCATTAAAGATTTTTAGGGGAGAATTGTGAGATGGCAATTCAGTGGT  
458 TGGCTGATATTGTGGAGTATTTAGAAGACCATGCTGTTGCTGATGGAAGGTTTACTTCATGTATGAAGGAAGCATTG  
459 ACTTCTCTTAGGGAATTGCACGGTGGGGAGGAAAAGGTCGACTTGATGGAGGGCTTCTTGAGGTTGCGTTGGATAG  
460 ATTGGAAGCGAATTTAGGCGGCTCTTGGTTGAAAATACTATTCCGTTGCCAATGTCTGCTCCAGCTTTACCTGGTG  
461 AACAAGCCTGCATTGCCCCCTCCCCTTTGCCAGTGACTGTTATCCAGAAGCTACAGGCTATAATCGGAAGATTGATT  
462 GCTAATAACAGGCTTGAAGAGTGCATATCGATTTATGTTGAGGTGAGGAGTTCTAATGTCCGCGCAAGTTTGCAGGC  
463 ACTTAATTTGGATTATTTAGAGATCTCGGTCTCCGAGTTCAATGATGTGCAGAGCATAGAGGGTACATTGCTCAGT  
464 GGGGTAAGCATTTAGAATTTGCTGTAAAGCATCTATTTGAAGCTGAGTATAAACTTTGTAATGATGTTTTTGGAGAGA  
465 ATAGGATTGGATGTGTGGATGAGCTGTTTTGCTAAGATAGCTGCCCAAGCAGGCATTTTTGCATTCTTCAATTTGG  
466 AAAAAGCTTTGCAGAGAGCAAGAAGGATCCTATCAAGCTTTTGAAGCTGTTGGACATATTTGCATCTTTAAACAAGT  
467 TAAGATTGGATTTCAATCGGCTCTTTGGTGGAGCTGCGTGTGTGGAAATACAAAATTTGACTAGGGATTTAATCAAG  
468 AGTGTGATCGAAGGGGCTAGTGAGATCTTTTGGGAACTTCTAGTTCAAGTTGAGTTGCAAAGGCAAATGCCGCCTCC  
469 TCCTGATGGCAGTGTTCAAAACCTTATCATTTTTTATCACTGATTATTGCAATAAGCTGCTTGGGGATGATTATAAGT  
470 CGATCCTCACCCAAGTTCTGATTATTGAAAGAAGTTGGAAGCACGAAAAGTTTCAAGAGCGGCTCCTCATTAAATGAG  
471 CTGCTGAATATAATGAGATCTGTTGATGTTAATTTAGAGAATTGGTTCGAAGGCCTATGAAGATGTTATTTTTGTCATA  
472 TGTGTTCTTGATGAATAATCATTGGCATCTATATAAGCATCTGAAAGGAACAAAGCTTGGAGGTCTGCTGGGAGATT  
473 CGCGGTTAAGAGAACATGAACAGTACAAGGAGTACTATTCTGCTTTCTTCTTGAAGAGAGCTGGGGAAAGCTTCCT  
474 GCTTTATTAAGCAGGGAAGGTCTTATTCTGTTTTCTGGTGGGCGTGCAGTCTCGTGATCTTGTCAAGAAACGATT  
475 AAAAGCTTTTAATGAAGCATTGATGAAATGTATAAGAAGCAGTCTAATTGGGTAATGCTTGACAAAGACCTACGGG  
476 ATAAGACATGCCAGCTAATCATTACAGGCGATTGTGCCTGTTTACCGGAGTTACATGCAGAACTATGGGCCATTGGTT  
477 GAACAAGAAGGAAGTACCAAATATGTGAAATATACGGCTCAGTCTTTGGAAAAAATGCTGAGCTCTCTTTTTTCATTC  
478 AAAACCTGTGAAACATGGCAGTTTCAAAGTCCGACATCCTAGTGGAATAATCAGCAATGGTATTACAGATCAGAATC  
479 AGACTTCTCCAACCTGTTAAATAA

480  
481  
482 >NtEXO70G2  
483 ATGCATGGGATTGAGAAGATCAAAGCTGCAAGAGAAAATTCTCAAGTGCAATATAGAGAAA  
484 TCAAGAGAATTAGGAGTAGAAATTGGTGATAGTGGCTGTAGATTGGAGAGTTGTGGGCAG  
485 AGGCTGAATTTCTTAGCAGCTGCCCTTAGAACTATAGCATGTAAATGTACATTATACAAG  
486 ATGATTGGTCGTGATATTGATCGCGCAATTGGTCCTGCTGCATCTGTTATTAAGATATTT  
487 GATGTCATTTGTGGACTTGAAAAAATCTTTCCACTGACCCTTCTGATGATATCTCAGCT  
488 TATCTCACCACACTCAAATGGATGGAAGAAGCGCTTGGCCTTCTCACCGATAACTGCAAA  
489 TTAGTCATTTCTTGGCTTGAACAAGCAATTGCAATTCCTCTGTTGCTGAAAGTTGGTAT  
490 GTTATGAATGTGAACAAGTGTGGTGAATATACTTAGGCAGTTGCAAGCTACAGAGGAACGTTCTCGTGCCAAAGGTGG  
491 AGCGTTGATGGTCGATTAGACAAGCTGGAAAGTGAATTGGCATCCTCGTTAACGGACATAGCTCCACTGTCTTTGCG

492 CTTTGCCAAATGTTATTCAAATGTGCAAGCTATTATTGATAGATTGGCTGTGAACCATAGATTTGACAAATGTACA  
493 TCTATTTATATTGAGGTTTCGGAGTTCAAATGTGAGAAAACTTTAGAAGAGCTGGATTTGGACTACCTGGAGGAG  
494 ATATCATTGACAGAGTTTGACAGTGTGTTGAGTGTAGAGTCTCACATTGACCAATGGCGC  
495 GAGCACTTGGAAATTCGCAGTGAAGGATTTGTTAGACATAGAACACAGGCTTTGCAATGAA  
496 ATATTCCAGAAATCAGCATCTAAAGATAGTAGCTGTACGGACTGCTTCGCAAAAATTGCA  
497 GTCCAATCTGGGATTCACTCTTTTCATCAAATTTGGCAACACAATTACCAGAGGGAAGAAA  
498 GAAGCAGTTAAGCTGTTGAAGTTATTGGACATGTTTGCTGCTCTAAAGAGACTACGCTCC  
499 GATTTCAACAGACTTTTCAGTGGAAAGAACTGTGGTGAATCCAGAGCCAAACAAGGGAT  
500 CTGATCAAGAAAGTTGTGAATGGGGCTTGTGAAATTTTCTGGCAACTTTCTCTTCAGGTG  
501 GAACTGCAGAGGACAAGTCTCCGGCGAATGGTAGTGTTCGAGGCTGGTTAACTTT  
502 GTCACTGAGTATTGTAATCAGCTTCTTGAGGATGAATATTGGTCCACACTTGTCCAAGTT  
503 GTGGAGATACATCAAGTTGGAACCACGAGAGCTCCGATAAGGAGCTTCTTCTAAATGAG  
504 ATGCGAAAAATAATAATGGTAATTGAGCTCAATTTAGAGAGTTGGGCAAAGACATACACG  
505 GACGACACTCTCTCCTATCTCTTCTTGATGAATAACCATTGGTACTTATGCAAGTACACG  
506 AAGGGAACGAACTTGGTGGAGCTAATGGGACACGAATGGATTAGAGGTCACGAGGAAAAC  
507 ATGGAGTACTACGAGACACTCTATTTGAGCGAGAGCTGGGGAAAACTCCCGACCTTCTG  
508 AGCGAGGAAGGTCTAGTGTGTTCCCTGGAGGGAGAGCCATTGATCGTCAAGTGGTTAAG  
509 AAGAGATTCAAGGAATTCACAGAGGCTTTTCGACGATATTTACAAGAGGCATTCCAATTGG  
510 GAATTGTGTGATAAGGGGCTAAGATGGAGAGTACGCCAACTCGTATTGCAGGTTGTTGTC  
511 CCTTCTTACAGTAGCTACCTAGCAAATAACATGCCCTCTATAGAATTTGAGGTTGCTAGT  
512 ACTGGTAATCAACACATAAAAATACACAGCTGAGACCTTAGGAAATATGATCAGTGGTCTA  
513 TTTGAACCAAAAAGTTGGAAGTATGGCAGTACTACCAAATGCACAGAATGGAGTGGAAAG  
514 CTTAATAATAGTATTGTTGCTAATCACCTTTCTTCCACACCTGCAGCAGCATGA

515

516

517 >NtEXO70H1 - 2

518 ATGGCAATTCTTGACATCTCTAAGAGAGAAGCATCGTCACCATCGACGCCAAGGCGAGCC  
519 AAGAAAAGCCTCTTCTCTTTACCAAAAACAATTATCCCTTTCTACATTTTCCAGTCAT  
520 TTACCTCCTCCAACACCTTCACACACACTCTCCCAATCAATCATGGAGGAAAACATCGAT  
521 AACGCTGAGACCATTATCAAAGATGGGATCCCAAAGAATCCTCCTTTGAGAAATTCTGT  
522 TCACTTTTTCAAGAAGACAGAAAAGAAGCCAAAGAATTCAATCAATGTGTCAAAGACTTA  
523 AAAAGAGCTATGCACCTTCTTGTGTTATGGAGCATTCAACTTCTAACAAGCTTGTGCTAGCA  
524 CATAACTTGATGCAAACAGCCATGAAAAGACTTGAGAAAGAATTCTATCAAATTTTGTCA  
525 ACAAACAAGGAGCATTTAGATCCAGAATCAGTATCTAAGTCTAGTCAATCCTCACACTTA  
526 TCACAATCAATTGCAGTTGATTACAAGAAGATGAAACTGGCTCTGAAAATGAGATTGAG  
527 GCAGTTGTTGAATCCATATCCGAGGTTGAACGGCTTTCTGTACTAGCTATGTCTGATCTC  
528 AACCTGATTGCAGATTGTATGGTTGGTTCTGGTTATGCAAAAGAGTGTGTGAAGATCTAC  
529 AAAATTATAAGAAAGTCAATCGTGGACGGAGGCCTCTATCGTCTTGGGATTGAATCACGT  
530 AGCTCGGCTTATATTAACGGGAAGAATTGAGATGCTCTTGAGCATCAAGTCAAGCACTGG  
531 ATAAATGCAGTGGAAAGTTGCAGTGAAAAACATTCTTCTATGGAGAGAGGTTTCTGTGTGAT  
532 CATGTGTTCTCAGCCTCCAACACAATCAGAGAAACATGTTTCACTGATATAGCAAAAGAA

533 GGTGGAATCAATCTGTTTTAGATTTCCAGAGGTTATTGCAAAATCCAAGAAATCACCTGAA  
534 AATATTTTTCTTTTTAATGGACTTGCATGAAAAATCTCAGAACTCTTGCCTGAGATTGAA  
535 TCAATCTTTTCGTATGAATCAATCTCAGCAGTCAAAGTGCAAGCCCTATCCACCCTTAC  
536 AAACCTTAAGGCCTCAATCCAAACAACCTCTCTCTGATTTTTGAGTCGTGATCCAGAAGAAT  
537 TCCTTAAGAACACCAATTCCTGGTGGTGGGATTCATCCATTGACCAATTCTGTTTTAGAT  
538 TATGTATGTTCACTGGCCAACTACAGCGGAGTCCTCTCTGATATAATTTGTGACTCTGCC  
539 CCCGCAGCACAATCGCCATTTCTGAATCTTACTTCGACAGTCCATCAGCCAACGAGACG  
540 CCAACTTCAGCAGTATCTGCTAGACTTGCTTGATCATCCTTGTCTCTTTGCAAGCTC  
541 GACAGCAAAGCTAAGCTTTATAATGACGTCGCTTTATCCTATCTTTTCTAGCTAACAAT  
542 CTCCAATTCGTTATCGAGAAGGTTTCGTACAAGTGTACTCAAGTGTCTTCTAGGAGATGAT  
543 TGGATATCAAAGCTTGAGAGAAAGGAAAACTATATGCAACAAACTACGAAAATGTGGCT  
544 TGGAATAAGGTGTTTTTGTGCCTGCCTGAAAGTTTGATCCATCAGTTTTCCCCTGATATA  
545 ATAAAGGAACATTTAGAAAATTCAACACAGCTTTTGACGAATCATAACCAGAAACAAAA  
546 TCTTGGGTGGTTCCAGATGGAAAGCTACGAGACGAGATCAAAGTGTCAATAGCAAGAAAA  
547 CTAGTACCTGCTTATCGAGATTTCTATGATTACTATATGATAGTATTGAGTGGGAAAAAG  
548 AATTTGGAGGTCTTAGTAAGATTTTCTCCTGATAATATAGGGAATTACTTGTGAGATTTG  
549 TTTTCATGAAACTGTGCCGTTAGGGAGTTTATTGTGAGCATCAACATTGCCAAACTCCTGT  
550 GTTTGGCAATGTCTTTCTTAA

551

552

553 >NtEX070H3 - 4b

554 ATGCCGAAAAAGACCTGAGAAATCTTTGTTGTTCTCCAAAACGTTTCATCTGATAGTACTTCTCAATCTACTTCACA  
555 ATTATCTTCCCCTTACGTTTTCTGTTTTTCATCTTCTCGCCCCGAGTTTTTCCGATTCGTTTATGGATCGGACCCTGG  
556 AGATGGCGGAGCCGATGATCATGAAATGGGACCCTAACACCACTACCTTCGCCAAAGTGACTTCTCTGTTCTATGAG  
557 AATAGAAGAGAAGCCAAGGATTTTATCAAGTGTGTGTATAATCTTCAAAGGCCATGCACTTTTATTCAACTGAGAA  
558 TTCGAAATCCGATAAGCTTGTTCGTGCTCAATCTCTAATGCAAATTCAGTGAAACGACTCCAAAAGGAGTTTTACC  
559 AGATTCTATCAATGAACAGAGCTCATTGGATCCTGAATCCATATCCACCGTGTCTCTCGAACTTCGATTCTGTTCCG  
560 AGTAGTTCTGATATCGACGATGAGAACGATGATGATCGTGTAATTGCCGGTGAGTCTGTTTCTGAAGTTGAGGACTT  
561 TTCTACTGTTGTAATGGCGGATTTGAGATTGATAGCAGAGTGCATGATTTCTTCTGGCTATGGAAAAGAATGTGTGA  
562 AGATTTACAAAGTTATACGTAAATCGATCATTGCTGAAGCCATTTACAGACTCGGAGTTGAGAAATTGAGTTCTTCCG  
563 CAGGTTCATAAAATGGATTGGGAAGTATTGGATCTGAAAATTAAGGATTGGCTTAACGCAGTGAATGTAGCCGTGAA  
564 AACATTGTTCAACGGAGAGAGAATTCTCTGCGATCACGTCTTTGTATCAGATGATTCAATAAGAGAGTCGTGTTTTA  
565 CTGAAATATCAAAGACGGAGCCATGATTCTGTTTAGCTTCCCGGAAAATGTGGCGAGAAATAGCAAGAAGTCGCCG  
566 GAAAAGTGTTCCGTCTTCTCGATATGTACACCGCCATTGCAGAACACTGGCCGGAGATTGAAGCTATATTTTCTTT  
567 CGATTACAGAAATCCGTTGTCCGATCTCAAGCGTTGACGTCCTCATCAAGCTCGGCGAATCTATAAGGACGGCGTTAG  
568 CTGAATTTGAAATTGCTCTACAGAAGGAATCCTCAAAAACGCCGGTGGCCGGCGGTGGAATCCACCATCTGACCATT  
569 GATGTAATGAATTATATCATTTTACTCGCTGATTTAGCAATGTACTCTCTGATATCCTCGCCGAGGCTCCTCCGCC  
570 GGCAGAAAGTTCCGTTGCCAGAATCATATTTCCGTATTTCCGATTCAAACGAATCTCCGGCACCGGCGATCTCACTCC  
571 GATTCGGTTGGTTAATTCTCGTTCTTCTCTGCAAACTAGACGGCAAAGCGAAGTACTACAAGGACGTATTCCTGGCG  
572 TATCTCTTCTTAGCCAACAATCTCCAATACGTCGTTGTAAGAGTCTGTACATCGAATCTCAAGTACTTGTAGGCGA  
573 AAATTGGATAACAAAACAGGAGAAAAGGTCAAACAGTTCGCGTCAAACACTATGAACGGCTAGGATGGAGCCACGTCA

574 TTGAATCCCTCCCGGAGAGCCAAGCACATCCATGGCTCCCAACCAAGTGAAGGAGATTTTCAAGAGATTCAATTCA  
575 TCATTTGCGGAAGCTCACCGTAAGTATTCTATCTGCGTCGTACCTGATAGTAAACTCCGCGATGATTTAAAAATATC  
576 AATCGCGAGAAAAATACTCCCAGTGTATAGAGAATTTTACAATAAATATAGAGGTGCAATAGTAAAAGAGAGACATT  
577 CTGCTCATGTTATTAGATTTGCTCCAGAGGATGTAGAGCATCAATTATCTGATTTATTTTTTTGAACTGATTATTGAA  
578 TCAGAAAGTTCTTCATCATTTGAGTTCTCCCCCTCACATACACATCACGGTTGCGATGAATAA

579

580

581 >Nt EXO70H5 - 8a

582 ATGAGGACCCCTTTTTCTCATCATCAAAACCTTCAACCCCTTACATAATTCATCATCT  
583 CCTAACACCTTTTCTGAAACTTTAATGGAAGAAACAATCGAATACTCTGAATTAATTATC  
584 AAAAAATGGGATCTTGATTCTCTCTGTCTCAACCACCTCTTATAACAGAGTCGCTAAT  
585 CTCTTCCGTGATAATCCGTTAGAAGCCAAGCAGCTTCTTAACGCCGTTAACGACTTACAA  
586 CATGCAATGCAGTTTGTATCAAAGATAGTTCCAGCTCTAAACTTCTAGTTTCGAGCTCAT  
587 AATCTCATGCAAATTGCCATAAGAAGACTTCAGAAAGAGTTCTACACTATCTTATCAGGA  
588 AGTCGTTACTTTCTTGATGCCGAAACGGTATCGTCAAGATCCTCAAGATCATCCACTGCC  
589 ACCCTATCAAGTCTTTCAGATGAAGATGAAGTTTCTGAAGACAATAATAATAGTGAAATT  
590 GAGAAGGTTTCAGAGGTTGTAATGGCGGATTTGAAATCAATAGCTGATTGTATGATTGGA  
591 GCTGGTTATGGAAGAGAGTGCCTGAAAATTTACAAACTCAATCGAAAATCAGTCATCGAT  
592 GAGACTTTGTATTACTTGGGGATTGAGAAATTGAGCTCTTACAGATTCAGAAAATGGAT  
593 TGGAATTACTGGAGATAAAAAATCAAGAATTGGTTGAGTGCTGTTAAGATTGCAGTTACT  
594 ACTCTGTTTACCGTGAGAGGATTCTCTGTGATTATGTCTTCTCTGCCTCGGACAACATA  
595 AGAGAATCCTGTTTCTCGGAGATTGCTAAAGATGGGGCTTTGACTCTGTTCTTGTTCCTCA  
596 GAAATGGTGGCCAAATATAAGAAGTTATCACTTGAGAAAATGTTTAGAGTGCTGGACGTC  
597 TACGACGCCATTTGTGAGCTTTGGGTTAAAATCGAATTGATTTTTCAGCTTTGATTCAATG  
598 GAGGTAGTCAAGTCTCAGGCGATGATATTACTGGTCAAGCTCGGCAATGCCGCTAGAGCC  
599 ATGTTGTGCGAGTTTGAATCGGCAGTTTCAGAAAGACACGTGCAAGGCAGTGCCAGGTGGC  
600 GGGGTTACCCGTTAACTCGATACGTATGAACTACCTTGTATCTCGGCGATTATAGT  
601 GACGCAATATCTGAAATAATCGTCGATTTACCGATTTCTGTTACAGACATCGTTGCCGGAA  
602 TCATACTACTTGAGCCTAACAACAGAAGACGGGGACTCTCCGCCTTCTGCCGTTGCCCTA  
603 CGACTTGCGTGGCTCGTACTCGTCCTTTTATGTAAACTCGATGGTAAAGCACAACTTTAC  
604 AAGGACGTGGCACTATCCTATTTGTTCTGGCGAACAACCTTAAACTACATCATTTCAAAG  
605 GTACAGGAATCGAACCTAAAGCTCCTACTTGGATCCGATTGGATTTTAAAGCACGAAATG  
606 AAGGTGAAAGAGTACATGTCAAAGTATGAGAGGATGGGTTGGAACAAAGTGCTGATGTCA  
607 TTACCTGAGAATTTGACGATTGAGATTTTCATCGATGGAAGTGAAGGAAAGGTTTAGCAA  
608 TTTAATTCGAGTTTCGAGGAGGTATATCGAAAACAAAGTTTCATGGGTCATACTCGACCAG  
609 AAACCTCAGAGACCAAGTCAAAGTATCACTAGCTAACAAGCTTGTTCGAGATACCAAACCT  
610 TTTTACGAGCAGCACCGAAGAGAATTGGTGAGGAATGTCACCGGAATGGAGTCAATTATT  
611 AGATTTGCCCTGATGATTTACAAAATTACTTATCGGATTTATTTTCATGGTGCTAATGTT  
612 TTGATTTCTAGTATGGGATGGAGTGGGACATCTTCGCCGTCTGTATCAACAACGTCAATG  
613 TCATCCTCAAATCGAAGCCGATAA

614

615

616 >NtEXO70H5 - 8b

617 ATGAGGACTGGTTTTTCTCTTCACCTATACATTCTTCTACTACTTCTAATTCTCCTTCA  
618 CGTCATACTACTTTTTCCGAAACTTTAATGGAGGAAACAATTAACGACGCTGGAGCAGTT  
619 ATTAAAAGATGGGATTTAGACGTTTTCTCTTCCAGTAGTTCTTACAATAGAGTCGCTAAT  
620 CTTTTCCGAGATTATCGTGATGAGGCACATCAATTTCTTGACGCTGTAAACAGATTACAA  
621 CATGGTATGCATTTTTGTTATTAAGAAAGTTCCAGATCCGAACTCCTTATTTCAGGCTCAA  
622 AATCTCATGCAAATTGCTATGAAGAGACTTCAGAAAGAAATGTACACTATTTTTATCTGGG  
623 AATCGTTATTTCTTAGACTCAGAACTGTGTCTAATTCTCGATCCTCTAGAGCATCAACT  
624 CGGTCCAGTGTTCGACGAAGATGATGAAATTAATGAGATAATTGATGCTGAGGTTTCG  
625 GTTTCAAGTACTCGAGTTTCTGAGATTGACAAAGTGTCTGAACGTGTCATGGCGGATTTA  
626 AAAGCCATAGCTGATTGTATGATTGGTGCTGGTTATGGTGCAGAGTGCGTTAAGATTTAC  
627 AAACCTTAATCGAAAATCAGTTGTTGATGAAACTTTGTATTATTTAGGTGTTGAAAAATTA  
628 ACCTTATCACAAGTTCAGAAAATGGATTGGTCATTGCTGGAGCAGAAAATAAGAATTGG  
629 TTAAGTGTGTGAAAATAGCAGTGAGTACACTTTTCCAAGGGGAAAAAATTCTCTGTGAT  
630 CACGTTTTCTCTGCTTCTGATTCAATTAGAGAAACGTGCTTTTCCGAAATTGCTAAAGAG  
631 AGTGCACCTCACGCTCTTTGCGTTTTCCAGAAATGGTGGCAAAGTACAAAAAGTTATCTCTT  
632 GAGAAAATGTTTCAGTGTGCTTGATTTGTACAACCTCAATTTCCGAGCTATGGGATGAAATC  
633 GAGTTGATTTTTAGTTTTCAATTCGTTAACAGTGGTCAAATCTCAAGCGGTGACGTCCTG  
634 GTCAAACCTCGGTGAAGCCGCGAGGTTTATGCTTTTCGGAGTTTGAATCGGCGATTAGAAA  
635 GATTCATCCAAAGCGGTGGCATGCGGTGGGGTCCACCCTCTGACTCGGTACGTTATGAAT  
636 TATCTCGTTTTCTCGGCGATTACAGCGGTGCGTTTTCTGAAATAATCGTCGATTGGCCG  
637 CTGTCGATAACAATCGCCGTTGCCAGAATCTTACTTCTCAGTCCAACCTCCCGACGACTAT  
638 GACTCGCCGTCTTCCGCCGTCTCCGTCCGCCTTGCGTGGCTAGTCCTCGTCCTCCTGTGC  
639 AAACCTTGACGGCAAAGCCAGCACTATAAAGATGTTTCATTATCCTATCTGTTCTTAGCG  
640 AACAACTTAAACTACGTCGTTTTCAAAGGTCAAAAAGTCAAACCTAAAGCTTTTGCTTGGGA  
641 TCCGATTGGTTATTAACCATGACGCTAAGGTAAAACAGTACATTTCAAATTACGAGAGA  
642 ATGGGATGGAGCAAAGTACTAACGTCATTCTGAAAATTCTACGGCTGAGATGTCTCCA  
643 CCTGAAGCAAGAGATTGGTTCGTACATTCAATTCGGATTTTGAGGAAGCGTATCGAACG  
644 CAGAGTTCGTGGGTTATACCCGACCCGAAACTCCGAGACGGAGTCAAATATCATTGGCT  
645 AAAAAAGTTATTTCCGGTTACCGGACGTTTTACGAAAAGTATCGGGAAATACTAAGAAGT  
646 GGCGGAGTGAAGTCAGTTGTCAGATTTGCCCTGATGATTTGCAAAATTACTTGTCCGAT  
647 TTATTTTCATGGAACCGGTCTTTCAGAGCATGGGACGACGTCGTACAGCTTATCACATTCA  
648 TCGCCGTCAAGTTTCAACGTCGTATCTCCGTACATGGCCGTTGA

649

650

651 >NtEXO70H5 - 8c

652 ATGACTGGGTTTTTCTCTTCATCCAAACCTGCACATTCTTCTCACAACCTTTCCTCTCCA  
653 TCCCCACCTCACACCTTCTCTGAAACTCTAATGGAGGATTATTAAAGAACGCTGAGGCC  
654 ATTATTAAGAAGATGGGATCTTGATAATGGCTCATCTAACAGCTCTTACTGCACAATATCA  
655 AATCTCTTTCCGCGATAATCGAGCAGAGGCTAAGCAGTTTGTGGATGCTGTAATCGACTTA



656 CAGCATGCTATGCGATTTGTTATCAAGGAAAGTTCCAGCTCCCAACAGCTTGTTCGAGCT  
657 CAAAAACTCATGCAAATAGCCATTAAGAGACTTGAGAAGGAGTTCGCACCATTTTGGCA  
658 GGAAATCGCTACTTCTTAGACTCTGAAAGTACTGCCTCAAGAGAGTATTCCAACCGGTCC  
659 AGTACTGGTTCAGATGAAGATCAAGCTTCTGAAGATGATAATACTGTTGACATTCAAGCT  
660 CGTTTTTCCGAGGTTTTCAATTACTGAAGAAGGTGAAAAGATTTCTGTAACAGCGGATCTG  
661 AGAGCAATTGCTGATTGTATGATTGATGCTGGGTACGGAAAAGAGTGCGCCCAGATTTAC  
662 CAACTTAATCGAAAATCAGTCATCGATGAGACATTGTATTGTCTGGGAATTGAAAGTTTT  
663 AATATTTTCAGTTATTAGAAAATGGATTGGGATGTTCTTGAGAAGAAAATAAAAAGTTGG  
664 TTGAGTGCTGTTAAGGTTGCTGTTTGTACTCTCCTTTATGGCGAGAGGATTCTCTGTGAC  
665 CAAGTCTTCGCCGTCTCCGACAACATCAGAGAGTCTTGTTTCTCGGAGATTGCTAAAGAC  
666 AGTGCTCTGGCGCTGTTCACTTTCCCGGAGATGGTGGCCAAGTACAAGAAATTGTCTATT  
667 GAGAAAATGTTCCGTATTCTCGACCTCTATGACGTTATTTCTGAACTCTGGAGTGAAATC  
668 GAATTGATTTTCCGGCTTTGACTCCACGGCGGTTGTGAGATCCCAGGCGATGAGCTCAATG  
669 GAGAAGCTTCGCGAAGCTGCTCGAGCCATCTTATCGGAGTTTGAATCGGCGATTAAGAAA  
670 GATTCTTCGAAAGTGGTGTCTGGTGGCGGAATCCACCCGCTAACTCGCTACGTCATGAAC  
671 TACCTTGTTTTCTCAGTGATTACAGTGGGCCTATCTCTGAAATTGTGCGCGATGTGCCG  
672 GTATCGGTGAAGTCGCCGCTGCCGGAGTCTTACCTATTGAGTCCAATCGCCGACGATGAG  
673 AACTCTCCTGCTTGCGCCGTTTTCCGTACGGCTTGCTTGGCTTATCCTCGTTCTCCTCTGC  
674 AAACTCGACGGCAAAGCAGGTTCTACGGTGACGTGCCTTTATCCTATTTGTTCTTAGCA  
675 AACAACTTAACTACGTCGTTTTCGAAGGTCCGAGAATCCAGCCTGAAGCTCCTATTAGGA  
676 TCCATTTGGCTCTCGAACCACGAAGCAAAGGTAGAACAGTACATGGAAAATTACAAGAGA  
677 ATGGGCTGGAGCAAGGTGCTGGCGTCACTGCCGAGAATTTAACGGTCGAGATTTCTCCG  
678 GCAGAAGTGAACCAGTGCTTCTGTAAATTCAATTCAGGTTTTCGAAGAGGCGTACCGAAAA  
679 CAGAATTCATGGGTATACCCGACCCGAAACTTCGTGACGAAGTCAAATATCACTGGCG  
680 AAGAAGATTGTTACAGCTTATCGAGCATTTTACGAGAAGAACTGGGAACTGTTTCAAGG  
681 AGTGGGAGCGGAGGCGAAGTGGAGTCAATTGTGAGATTTGTCCCTGATGATTTGCAAAAT  
682 TACTTATCCGATTTATTTTATGAACTGGTTTTTTCAGAAAATAGCAGTACGTCGCACGGG  
683 TCATCTTCGCGGTCAACTTCAACGTTCTCATCTCCATTACGTTGA  
684  
685  
686  
687
